# Supplementary material for: The Skin We Live in: Pigmentation Traits and Tanning Behaviour in British Young Adults, an Observational and Genetically-Informed Study
Source: MDPI journal article supplement (doi:10.3390/genes13050896), 2022-05-17
Supplement: s1 [file s1]

**Supplementary Table S2.** Best area under the curve (AUC) at a population level and mean (standard deviation) loss of AUC for each predicted trait in ALSPAC young people (YP) (N = 8564).

| trait              | full AUC | loss of AUC       |
|--------------------|----------|-------------------|
| blue eyes          | 0.939    | 0.00042 (0.00098) |
| intermediate eyes  | 0.736    | 0.00172 (0.00398) |
| brown eyes         | 0.946    | 0.00071 (0.00167) |
| blond hair         | 0.813    | 0.00403 (0.00445) |
| brown hair         | 0.741    | 0.00252 (0.00390) |
| red hair           | 0.929    | 0.00858 (0.01692) |
| black hair         | 0.859    | 0.00196 (0.00341) |
| hair shade         | 0.905    | 0.00160 (0.00297) |
| very pale skin     | 0.830    | 0.00101 (0.00314) |
| pale skin          | 0.763    | 0.00225 (0.00335) |
| intermediate skin  | 0.783    | 0.00307 (0.00434) |
| dark skin          | 0.981    | 0.00087 (0.00207) |
| dark to black skin | 0.993    | 0.00051 (0.00081) |

**Supplementary Table S3.** Text answers of ALSPAC young people (YP) who responded “other” to the question “Why do you like to tan?”. Percentages over the total number of answers are shown.

| reasons                                                                                                                                                               | n = 331<br>answers | %    |
|-----------------------------------------------------------------------------------------------------------------------------------------------------------------------|--------------------|------|
| like or enjoy being under the sun                                                                                                                                     | 49                 | 14.8 |
| like tanned skin                                                                                                                                                      | 48                 | 14.5 |
| look or be healthier                                                                                                                                                  | 47                 | 14.2 |
| helps with skin problems such as acne, eczema, spots                                                                                                                  | 44                 | 13.3 |
| associated to holidays or beach                                                                                                                                       | 21                 | 6.3  |
| increase vitamin D                                                                                                                                                    | 17                 | 5.2  |
| look or feel good/nice                                                                                                                                                | 17                 | 5.2  |
| is relaxing/enjoyable                                                                                                                                                 | 15                 | 4.5  |
| social reasons & professional reasons                                                                                                                                 | 12                 | 3.6  |
| have glowing skin                                                                                                                                                     | 11                 | 3.3  |
| look more attractive                                                                                                                                                  | 10                 | 3.0  |
| due to outside activities/sports                                                                                                                                      | 8                  | 2.4  |
| feel warm or summery                                                                                                                                                  | 7                  | 2.1  |
| feel happy                                                                                                                                                            | 5                  | 1.5  |
| other reasons (YP is naturally tanned, just happens, likes freckles, no special reason, does it sometimes, why not do that, photos/shoots, does not do it frequently) | 20                 | 6.0  |

**Supplementary Table S4.** Text answers of ALSPAC young people (YP) who reported having “other” hair colour. Percentages over the total number of answers are shown.

| hair colour category | n = 79<br>answers | %    |
|----------------------|-------------------|------|
| red                  | 26                | 32.9 |
| blond                | 15                | 19.0 |
| ginger               | 14                | 17.7 |
| brown                | 12                | 15.2 |
| auburn               | 7                 | 8.9  |
| other                | 5                 | 6.3  |

**Supplementary Table S5.** Text answers of ALSPAC young people (YP) who reported having “other” eye colour. Percentages over the total number of answers are shown.

| eye colour category | n = 257<br>answers | %    |
|---------------------|--------------------|------|
| hazel               | 110                | 42.8 |
| green               | 56                 | 21.8 |
| blue                | 35                 | 13.6 |
| black/brown         | 27                 | 10.5 |
| grey                | 14                 | 5.4  |
| other               | 10                 | 3.9  |
| changing            | 5                  | 1.9  |

**Supplementary Table S7.** Text answers of ALSPAC young people (YP) who reported taking “other” measures for sun protection.

Percentages over the total number of answers are shown.

| sun protective measures                                                                                | n = 48<br>answers | %    |
|--------------------------------------------------------------------------------------------------------|-------------------|------|
| sit in the shade                                                                                       | 13                | 27.1 |
| use protection sometimes & frequent breaks from the sun &<br>physical barriers such as clothing        | 9                 | 18.8 |
| sunscreen products                                                                                     | 8                 | 16.7 |
| sunglasses                                                                                             | 6                 | 12.5 |
| moisturizing products & tanning oils                                                                   | 6                 | 12.5 |
| other measures (drink water, wear make-up, depends how hot it<br>is, all of the above, lip protection) | 6                 | 12.5 |

**Supplementary Table S8.** Factors associated with reasons for liking to tan. Only those with the strongest evidence for association are shown.

| reason for tanning                                                 | it gives YP more confidence <sup>a</sup>    | it makes YP feel happier <sup>a</sup>          | makes YP look better in photos <sup>a</sup>   | makes YP look thinner <sup>a</sup>          | conceals body imperfections <sup>a</sup>    | YP looks more attractive to others <sup>a</sup> | pale skin is unattractive <sup>a</sup>          |
|--------------------------------------------------------------------|---------------------------------------------|------------------------------------------------|-----------------------------------------------|---------------------------------------------|---------------------------------------------|-------------------------------------------------|-------------------------------------------------|
| <b>sex</b> (0=female/1=male) (N=1930)                              | 0.34<br>(0.27,0.42), <<br>10 <sup>-26</sup> | 0.44<br>(0.35,0.54),<br>1.35x10 <sup>-13</sup> | 0.67<br>(0.54,0.82),<br>1.57x10 <sup>-4</sup> | 0.05<br>(0.03,0.09), <<br>10 <sup>-26</sup> | 0.14<br>(0.09,0.20), <<br>10 <sup>-26</sup> | 1.17<br>(0.95,1.44),<br>0.136                   | 0.81<br>(0.62,1.05),<br>0.106                   |
| <b>mother's social class</b><br>(0>manual/1=non-manual) (N=1598)   | 1.33<br>(0.98,1.80),<br>0.068               | 1.19<br>(0.86,1.64),<br>0.290                  | 0.94<br>(0.70,1.26),<br>0.695                 | 1.04<br>(0.74,1.45),<br>0.837               | 1.23<br>(0.88,1.72),<br>0.223               | 1.27<br>(0.95,1.70),<br>0.109                   | 0.61<br>(0.44,0.84),<br>0.003                   |
| <b>father's social class</b><br>(0>manual/1=non-manual) (N=1704)   | 0.96<br>(0.78,1.20),<br>0.743               | 1.02<br>(0.81,1.27),<br>0.875                  | 1.10<br>(0.90,1.34),<br>0.357                 | 1.00<br>(0.79,1.27),<br>0.996               | 1.00<br>(0.79,1.25),<br>0.973               | 1.26<br>(1.03,1.53),<br>0.025                   | 0.78<br>(0.61,0.99),<br>0.041                   |
| <b>maternal education</b><br>(N=1814) (model p-value) <sup>1</sup> | 0.834                                       | 0.250                                          | 0.989                                         | 0.578                                       | 0.099                                       | 0.007                                           | 0.039                                           |
| 0 level                                                            | 1.09<br>(0.82,1.45),<br>0.548               | 1.19<br>(0.88,1.60),<br>0.260                  | 1.02<br>(0.78,1.33),<br>0.896                 | 0.99<br>(0.73,1.36),<br>0.971               | 1.33<br>(0.97,1.81),<br>0.078               | 1.33<br>(1.02,1.74),<br>0.037                   | 0.77<br>(0.57,1.05),<br>0.105                   |
| > 0 level                                                          | 1.05<br>(0.80,1.38),<br>0.717               | 0.98<br>(0.74,1.29),<br>0.866                  | 1.00<br>(0.78,1.29),<br>0.972                 | 0.88<br>(0.65,1.20),<br>0.423               | 1.38<br>(1.02,1.87),<br>0.034               | 1.50<br>(1.16,1.93),<br>0.002                   | 0.68<br>(0.51,0.91),<br>0.011                   |
| <b>skin colour</b> (N=1929)<br>(model p-value) <sup>2</sup>        | 0.023                                       | 0.038                                          | 0.013                                         | 0.386                                       | 0.039                                       | 0.004                                           | 4.99x10 <sup>-5</sup>                           |
| fair                                                               | 0.64<br>(0.45,0.89),<br>0.008               | 1.31<br>(0.96,1.79),<br>0.093                  | 0.74<br>(0.55,1.00),<br>0.051                 | 0.85<br>(0.61,1.17),<br>0.318               | 0.73<br>(0.53,0.99),<br>0.044               | 0.66<br>(0.49,0.88),<br>0.005                   | 0.55<br>(0.41,0.76), <<br>2.31x10 <sup>-4</sup> |

|                                                                             |                               |                               |                                               |                               |                               |                                               |                                                 |
|-----------------------------------------------------------------------------|-------------------------------|-------------------------------|-----------------------------------------------|-------------------------------|-------------------------------|-----------------------------------------------|-------------------------------------------------|
| olive                                                                       | 0.81<br>(0.56,1.16),<br>0.249 | 1.58<br>(1.11,2.24),<br>0.011 | 0.92<br>(0.66,1.28),<br>0.633                 | 0.91<br>(0.63,1.31),<br>0.622 | 0.83<br>(0.59,1.18),<br>0.297 | 0.78<br>(0.57,1.08),<br>0.130                 | 0.44<br>(0.31,0.64), <<br>1.15x10 <sup>-5</sup> |
| brown                                                                       | 0.64<br>(0.36,1.14),<br>0.130 | 1.98<br>(1.07,3.68),<br>0.030 | 0.49<br>(0.28,0.84),<br>0.009                 | 0.54<br>(0.25,1.14),<br>0.107 | 0.39<br>(0.18,0.82),<br>0.013 | 0.43<br>(0.25,0.74),<br>0.003                 | 0.33<br>(0.16,0.68),<br>0.003                   |
| <b>tanning ability</b> (N=1923)<br>(model p-value) <sup>3</sup>             | 0.023                         | 0.004                         | 0.035                                         | 0.760                         | 0.080                         | 0.049                                         | 4.78x10 <sup>-7</sup>                           |
| burns easily rarely tans                                                    | 0.61<br>(0.23,1.67),<br>0.339 | 0.10<br>(0.01,0.77),<br>0.027 | 0.44<br>(0.17,1.12),<br>0.085                 | 0.80<br>(0.35,1.81),<br>0.593 | 0.44 (0.2,0.98),<br>0.044     | 0.80<br>(0.36,1.76),<br>0.574                 | 0.50<br>(0.23,1.10),<br>0.085                   |
| doesn't change                                                              | 0.68<br>(0.23,2.05),<br>0.496 | 0.11<br>(0.01,0.83),<br>0.033 | 0.40<br>(0.14,1.09),<br>0.074                 | 1.07<br>(0.42,2.76),<br>0.887 | 0.37<br>(0.15,0.95),<br>0.038 | 0.69<br>(0.28,1.68),<br>0.409                 | 0.36<br>(0.14,0.92),<br>0.033                   |
| tans easily rarely burns                                                    | 0.54<br>(0.20,1.45),<br>0.220 | 0.13<br>(0.02,0.98),<br>0.048 | 0.41<br>(0.16,1.03),<br>0.057                 | 0.77<br>(0.34,1.71),<br>0.518 | 0.39<br>(0.18,0.84),<br>0.017 | 0.61<br>(0.28,1.33),<br>0.212                 | 0.26<br>(0.12,0.56),<br>5.76x10 <sup>-4</sup>   |
| always tans never burns                                                     | 0.74<br>(0.25,2.21),<br>0.593 | 0.13<br>(0.02,1.02),<br>0.052 | 0.38<br>(0.14,1.04),<br>0.059                 | 0.66<br>(0.25,1.72),<br>0.395 | 0.47<br>(0.19,1.16),<br>0.100 | 0.42<br>(0.17,1.03),<br>0.059                 | 0.30<br>(0.12,0.75),<br>0.010                   |
| can't say, skin always<br>protected                                         | 0.22<br>(0.07,0.71),<br>0.011 | 0.05<br>(0.01,0.41),<br>0.005 | 0.17<br>(0.06,0.51),<br>0.002                 | 0.62<br>(0.21,1.87),<br>0.398 | 0.20<br>(0.06,0.61),<br>0.005 | 0.54<br>(0.20,1.43),<br>0.214                 | 0.23<br>(0.07,0.68),<br>0.009                   |
| <b>sunburning past 2 years</b><br>(N=1868) (model p-<br>value) <sup>4</sup> | 0.041                         | 0.190                         | 1.79x10 <sup>-4</sup>                         | 0.053                         | 0.112                         | 1.52x10 <sup>-6</sup>                         | 0.012                                           |
| once                                                                        | 1.35<br>(1.02,1.80),<br>0.037 | 0.82<br>(0.61,1.11),<br>0.196 | 1.60<br>(1.22,2.09),<br>6.24x10 <sup>-4</sup> | 1.28<br>(0.92,1.78),<br>0.138 | 1.31<br>(0.96,1.80),<br>0.086 | 1.51<br>(1.15,1.98),<br>0.003                 | 1.28<br>(0.91,1.81),<br>0.160                   |
| twice                                                                       | 1.18<br>(0.90,1.56),<br>0.235 | 0.77<br>(0.57,1.03),<br>0.073 | 1.29<br>(0.99,1.67),<br>0.059                 | 1.24<br>(0.89,1.71),<br>0.200 | 1.20<br>(0.88,1.64),<br>0.247 | 1.65<br>(1.26,2.15),<br>2.37x10 <sup>-4</sup> | 1.47<br>(1.06,2.06),<br>0.023                   |

|                                                                                  |                                               |                                               |                                               |                                               |                               |                                               |                                               |
|----------------------------------------------------------------------------------|-----------------------------------------------|-----------------------------------------------|-----------------------------------------------|-----------------------------------------------|-------------------------------|-----------------------------------------------|-----------------------------------------------|
| 3times                                                                           | 1.56<br>(1.08,2.26),<br>0.018                 | 1.13<br>(0.76,1.68),<br>0.544                 | 2.03<br>(1.43,2.88),<br>6.62x10 <sup>-5</sup> | 1.44<br>(0.96,2.17),<br>0.077                 | 1.69<br>(1.15,2.48),<br>0.007 | 2.06<br>(1.46,2.90),<br>3.37x10 <sup>-5</sup> | 1.72<br>(1.15,2.60),<br>0.009                 |
| 4times                                                                           | 1.49<br>(0.96,2.29),<br>0.073                 | 1.08<br>(0.68,1.70),<br>0.756                 | 1.65<br>(1.10,2.47),<br>0.015                 | 1.24<br>(0.76,2.03),<br>0.395                 | 1.36<br>(0.85,2.16),<br>0.196 | 2.68<br>(1.78,4.03),<br>2.21x10 <sup>-6</sup> | 1.27<br>(0.77,2.10),<br>0.349                 |
| 5times or more                                                                   | 1.98<br>(1.16,3.36),<br>0.012                 | 0.97<br>(0.57,1.66),<br>0.924                 | 2.08<br>(1.28,3.37),<br>0.003                 | 2.39<br>(1.40,4.11),<br>0.002                 | 1.63<br>(0.96,2.77),<br>0.069 | 1.93<br>(1.21,3.08),<br>0.006                 | 2.43<br>(1.44,4.10),<br>9.19x10 <sup>-4</sup> |
| <b>YP does not use sun protection (N=1928)</b>                                   | 0.92<br>(0.64,1.34),<br>0.667                 | 0.67<br>(0.47,0.97),<br>0.035                 | 0.84<br>(0.59,1.20),<br>0.341                 | 1.06<br>(0.68,1.64),<br>0.799                 | 1.24<br>(0.83,1.86),<br>0.297 | 1.29<br>(0.91,1.82),<br>0.160                 | 1.82<br>(1.24,2.65),<br>0.002                 |
| <b>wears sunblock (N=1928)</b>                                                   | 1.47<br>(1.01,2.14),<br>0.046                 | 1.38<br>(0.94,2.02),<br>0.103                 | 1.64<br>(1.13,2.36),<br>0.008                 | 1.07<br>(0.67,1.71),<br>0.764                 | 1.23<br>(0.79,1.94),<br>0.362 | 0.93<br>(0.65,1.34),<br>0.690                 | 0.73<br>(0.48,1.10),<br>0.132                 |
| <b>wears a hat (N=1928)</b>                                                      | 0.93<br>(0.75,1.17),<br>0.550                 | 1.19<br>(0.93,1.50),<br>0.161                 | 0.97<br>(0.78,1.20),<br>0.768                 | 0.95<br>(0.73,1.23),<br>0.689                 | 0.93<br>(0.73,1.19),<br>0.572 | 0.74<br>(0.60,0.91),<br>0.005                 | 0.85<br>(0.66,1.10),<br>0.225                 |
| <b>tanning helps prevent sunburn (N=1926) (model p-value)<sup>5</sup></b>        | 1.76x10 <sup>-4</sup>                         | 0.001                                         | 4.31x10 <sup>-6</sup>                         | 8.42x10 <sup>-6</sup>                         | 0.006                         | 0.044                                         | 3.91x10 <sup>-5</sup>                         |
| yes                                                                              | 2.06<br>(1.47,2.90),<br>3.21x10 <sup>-5</sup> | 1.95<br>(1.36,2.80),<br>2.56x10 <sup>-4</sup> | 2.18<br>(1.60,2.98),<br>7.29x10 <sup>-7</sup> | 2.07<br>(1.51,2.83),<br>6.31x10 <sup>-6</sup> | 1.65<br>(1.21,2.24),<br>0.001 | 1.39<br>(1.05,1.84),<br>0.023                 | 2.02<br>(1.49,2.74),<br>6.95x10 <sup>-6</sup> |
| don't know                                                                       | 1.08<br>(0.84,1.39),<br>0.529                 | 1.13<br>(0.87,1.46),<br>0.373                 | 1.05<br>(0.83,1.33),<br>0.694                 | 0.87<br>(0.65,1.18),<br>0.381                 | 1.13<br>(0.85,1.49),<br>0.369 | 0.93<br>(0.74,1.17),<br>0.532                 | 1.09<br>(0.82,1.46),<br>0.534                 |
| <b>indoor tanning can cause skin cancer (N=1924) (model p-value)<sup>5</sup></b> | 0.005                                         | 0.013                                         | 0.348                                         | 2.36x10 <sup>-4</sup>                         | 0.005                         | 0.001                                         | 0.107                                         |
| yes                                                                              | 1.16<br>(0.64,2.10),<br>0.631                 | 1.45<br>(0.81,2.62),<br>0.213                 | 0.98<br>(0.55,1.72),<br>0.931                 | 0.64<br>(0.35,1.18),<br>0.155                 | 0.90<br>(0.49,1.65),<br>0.732 | 1.03<br>(0.59,1.79),<br>0.921                 | 0.61<br>(0.34,1.10),<br>0.101                 |

|                                                        |                                               |                               |                                               |                                               |                                               |                               |                               |
|--------------------------------------------------------|-----------------------------------------------|-------------------------------|-----------------------------------------------|-----------------------------------------------|-----------------------------------------------|-------------------------------|-------------------------------|
| don't know                                             | 0.72<br>(0.37,1.39),<br>0.326                 | 1.26<br>(0.65,2.45),<br>0.489 | 0.58<br>(0.31,1.09),<br>0.091                 | 0.25<br>(0.12,0.54),<br>3.88x10 <sup>-4</sup> | 0.45<br>(0.21,0.92),<br>0.030                 | 0.54<br>(0.29,1.02),<br>0.057 | 0.47<br>(0.24,0.95),<br>0.035 |
| <b>YP trying to change skin colour (N=1537)</b>        | 2.36<br>(1.54,3.62),<br>8.55x10 <sup>-5</sup> | 1.62<br>(1.07,2.47),<br>0.023 | 1.92<br>(1.34,2.76),<br>3.75x10 <sup>-4</sup> | 2.06<br>(1.45,2.94),<br>5.95x10 <sup>-5</sup> | 1.69<br>(1.19,2.39),<br>0.003                 | 1.73<br>(1.24,2.42),<br>0.001 | 1.79<br>(1.25,2.56),<br>0.001 |
| <b>YP trying to change hair colour (N=1537)</b>        | 1.48<br>(0.94,2.35),<br>0.094                 | 1.53<br>(0.93,2.51),<br>0.091 | 2.14<br>(1.38,3.31),<br>7.05x10 <sup>-4</sup> | 1.99<br>(1.32,3.00),<br>0.001                 | 2.09<br>(1.39,3.13),<br>3.52x10 <sup>-4</sup> | 1.25<br>(0.85,1.85),<br>0.264 | 1.41<br>(0.91,2.19),<br>0.123 |
| <b>YP's teachers treat everybody the same (N=1478)</b> | 1.51<br>(0.82,2.78),<br>0.189                 | 1.41<br>(0.74,2.68),<br>0.300 | 0.90<br>(0.52,1.54),<br>0.695                 | 1.62<br>(0.85,3.10),<br>0.146                 | 1.44<br>(0.77,2.68),<br>0.253                 | 0.63<br>(0.36,1.10),<br>0.104 | 2.04<br>(1.15,3.63),<br>0.015 |

<sup>a</sup>OR (95% CI), p-value, from logistic regression model adjusted for age and sex. YP = young person.

<sup>1</sup>reference: < 0 level

<sup>2</sup>reference: very fair

<sup>3</sup>reference: always burns, never tans

<sup>4</sup>reference: never

<sup>5</sup>reference: no



**Supplementary Table S9.** Association of socio-demographic, pigmentation-related and sun exposure factors with outdoor tanning in ALSPAC young people (YP) who like to tan.

| <b>exposure</b>                                      | <b>OR<sup>a</sup></b> | <b>95% CI</b> | <b>p-value</b>         | <b>N</b> |
|------------------------------------------------------|-----------------------|---------------|------------------------|----------|
| <b>sex</b> (0=female/1=male)                         | 6.11                  | (3.29,11.32)  | 9.35x10 <sup>-9</sup>  | 1929     |
| <b>age</b> (years)                                   | 1.25                  | (0.96,1.62)   | 0.103                  | 1929     |
| <b>mother's social class</b> (0=manual/1=non-manual) | 1.66                  | (1.09,2.52)   | 0.018                  | 1597     |
| <b>father's social class</b> (0=manual/1=non-manual) | 1.60                  | (1.15,2.21)   | 0.005                  | 1703     |
| <b>mother's education</b>                            |                       |               | 3.83x10 <sup>-5</sup>  | 1813     |
| < 0 level                                            | reference             |               |                        |          |
| 0 level                                              | 1.68                  | (1.14,2.47)   | 0.009                  |          |
| > 0 level                                            | 2.44                  | (1.66,3.61)   | 6.55x10 <sup>-6</sup>  |          |
| <b>skin colour</b>                                   |                       |               | 2.71x10 <sup>-12</sup> | 1928     |
| very fair                                            | reference             |               |                        |          |
| fair                                                 | 3.09                  | (2.14,4.44)   | 1.35x10 <sup>-9</sup>  |          |
| olive                                                | 5.30                  | (3.25,8.66)   | 2.66x10 <sup>-11</sup> |          |
| brown                                                | 9.42                  | (2.22,40.03)  | 0.002                  |          |
| <b>eye colour</b>                                    |                       |               | 0.942                  | 1925     |
| blue                                                 | reference             |               |                        |          |
| green                                                | 1.07                  | (0.72,1.58)   | 0.748                  |          |
| grey                                                 | 1.56                  | (0.55,4.47)   | 0.405                  |          |
| brown                                                | 1.06                  | (0.74,1.52)   | 0.766                  |          |
| other                                                | 0.99                  | (0.49,2.00)   | 0.980                  |          |
| <b>natural hair colour at 18 years old</b>           |                       |               | 8.39x10 <sup>-6</sup>  | 1908     |
| red                                                  | reference             |               |                        |          |
| blond                                                | 3.72                  | (1.85,7.44)   | 2.14x10 <sup>-4</sup>  |          |
| light brown                                          | 5.10                  | (2.60,9.98)   | 2.02x10 <sup>-6</sup>  |          |
| dark brown                                           | 5.94                  | (3.00,11.80)  | 3.43x10 <sup>-7</sup>  |          |

|                                        |           |               |                        |      |
|----------------------------------------|-----------|---------------|------------------------|------|
| black                                  | 1.00      | n/a           | n/a                    |      |
| other                                  | 3.32      | (0.96,11.50)  | 0.058                  |      |
| <b>YP has freckles</b>                 |           |               | 0.004                  | 1925 |
| no                                     | reference |               |                        |      |
| yes, a few                             | 0.62      | (0.44,0.87)   | 0.006                  |      |
| yes, many                              | 0.51      | (0.32,0.80)   | 0.003                  |      |
| <b>tanning ability</b>                 |           |               | 1.69x10 <sup>-17</sup> | 1922 |
| always burns never tans                | reference |               |                        |      |
| burns easily rarely tans               | 8.24      | (3.50,19.41)  | 1.37x10 <sup>-6</sup>  |      |
| doesn't change                         | 4.69      | (1.75,12.55)  | 0.002                  |      |
| tans easily rarely burns               | 23.79     | (10.13,55.86) | 3.41x10 <sup>-13</sup> |      |
| always tans never burns                | 14.21     | (4.72,42.79)  | 2.40x10 <sup>-6</sup>  |      |
| can't say, skin always protected       | 14.78     | (3.93,55.58)  | 6.72x10 <sup>-5</sup>  |      |
| <b>sun burning in the past 2 years</b> |           |               | 0.022                  | 1867 |
| never                                  | reference |               |                        |      |
| once                                   | 1.32      | (0.88,1.98)   | 0.178                  |      |
| twice                                  | 1.93      | (1.25,2.97)   | 0.003                  |      |
| 3 times                                | 1.89      | (1.06,3.38)   | 0.031                  |      |
| 4 times                                | 1.57      | (0.80,3.07)   | 0.186                  |      |
| 5 times or more                        | 0.84      | (0.43,1.64)   | 0.611                  |      |
| <b>sun protection (0=no/1=yes)</b>     |           |               |                        |      |
| never uses protection                  | 0.70      | (0.41,1.20)   | 0.193                  | 1927 |
| wears hat                              | 1.21      | (0.83,1.75)   | 0.317                  | 1927 |
| wears clothing                         | 0.89      | (0.63,1.25)   | 0.496                  | 1927 |
| wears sunblock                         | 1.35      | (0.76,2.40)   | 0.298                  | 1927 |
| avoids the sun                         | 0.83      | (0.50,1.38)   | 0.463                  | 1927 |
| <b>sunblock factor</b>                 |           |               | 0.162                  | 1797 |
| lower than 15                          | reference |               |                        |      |

|                                                                                        |           |             |       |      |
|----------------------------------------------------------------------------------------|-----------|-------------|-------|------|
| 15-24                                                                                  | 0.94      | (0.49,1.80) | 0.856 |      |
| 25-49                                                                                  | 0.80      | (0.42,1.52) | 0.492 |      |
| 50 or higher                                                                           | 0.52      | (0.24,1.11) | 0.092 |      |
| <b>skin cancer</b> (0=no/1=yes)                                                        |           |             |       |      |
| YP has family member diagnosed with skin cancer                                        | 0.82      | (0.54,1.24) | 0.339 | 1924 |
| <b>beliefs about tanning</b>                                                           |           |             |       |      |
| YP believes indoor tanning helps prevent sunburn                                       |           |             | 0.016 | 1925 |
| no                                                                                     | reference |             |       |      |
| yes                                                                                    | 0.55      | (0.37,0.83) | 0.004 |      |
| don't know                                                                             | 0.86      | (0.58,1.28) | 0.452 |      |
| YP thinks indoor tanning using sun bed/sun lamp can cause skin cancer                  |           |             | 0.580 | 1923 |
| no                                                                                     | reference |             |       |      |
| yes                                                                                    | 1.51      | (0.69,3.30) | 0.300 |      |
| don't know                                                                             | 1.44      | (0.57,3.60) | 0.437 |      |
| <b>body image</b>                                                                      |           |             |       |      |
| YP is trying to change skin colour (0=no/1=yes)                                        | 0.84      | (0.50,1.39) | 0.490 | 1536 |
| YP is trying to change hair colour (0=no/1=yes)                                        | 0.60      | (0.35,1.03) | 0.063 | 1536 |
| YP has been hurt because of their skin colour (0=no/1=yes)                             | 0.66      | (0.08,5.42) | 0.695 | 1603 |
| YP has been called names because of their skin colour (0=no/1=yes)                     | 0.50      | (0.18,1.36) | 0.175 | 1607 |
| YP has seen someone bullied because of their skin colour (0=no/1=yes)                  | 1.07      | (0.73,1.57) | 0.741 | 1598 |
| YP's teachers treat everybody the same, regardless of skin colour (0=agree/1=disagree) | 0.70      | (0.29,1.71) | 0.438 | 1477 |

<sup>a</sup>Adjusted for age and sex.

**Supplementary Table S10.** Association of socio-demographic, pigmentation-related and sun exposure factors with indoor tanning in the past 12 months amongst ALSPAC young people (YP) who manifested ever engaging in indoor tanning using a sun bed/sun lamp/tanning booth.

| <b>exposure</b>                                      | <b>OR<sup>a</sup></b> | <b>95% CI</b> | <b>p-value</b>        | <b>N</b> |
|------------------------------------------------------|-----------------------|---------------|-----------------------|----------|
| <b>sex</b> (0=female/1=male)                         | 0.79                  | (0.54,1.15)   | 0.216                 | 946      |
| <b>age</b> (years)                                   | 0.83                  | (0.66,1.03)   | 0.095                 | 946      |
| <b>mother's social class</b> (0>manual/1=non-manual) | 1.01                  | (0.69,1.47)   | 0.970                 | 775      |
| <b>father's social class</b> (0>manual/1=non-manual) | 0.61                  | (0.46,0.80)   | 4.46x10 <sup>-4</sup> | 837      |
| <b>mother's education</b>                            |                       |               | 0.014                 | 884      |
| < O level                                            | reference             |               |                       |          |
| O level                                              | 1.18                  | (0.83,1.67)   | 0.356                 |          |
| > O level                                            | 0.75                  | (0.53,1.06)   | 0.108                 |          |
| <b>skin colour</b>                                   |                       |               | 0.003                 | 943      |
| very fair                                            | reference             |               |                       |          |
| fair                                                 | 1.60                  | (1.08,2.38)   | 0.019                 |          |
| olive                                                | 2.24                  | (1.44,3.50)   | 3.57x10 <sup>-4</sup> |          |
| brown                                                | 2.60                  | (1.03,6.55)   | 0.043                 |          |
| <b>eye colour</b>                                    |                       |               | 0.131                 | 945      |
| blue                                                 | reference             |               |                       |          |
| green                                                | 1.47                  | (1.05,2.06)   | 0.025                 |          |
| grey                                                 | 2.06                  | (0.88,4.82)   | 0.096                 |          |
| brown                                                | 1.21                  | (0.89,1.65)   | 0.227                 |          |
| other                                                | 1.08                  | (0.56,2.09)   | 0.823                 |          |
| <b>natural hair colour at 18 years old</b>           |                       |               | 0.725                 | 946      |
| red                                                  | reference             |               |                       |          |
| blonde                                               | 1.97                  | (0.65,6.00)   | 0.231                 |          |
| light brown                                          | 1.95                  | (0.65,5.81)   | 0.233                 |          |

|                                        |           |              |                       |     |
|----------------------------------------|-----------|--------------|-----------------------|-----|
| dark brown                             | 2.00      | (0.67,6.01)  | 0.215                 |     |
| black                                  | 0.60      | (0.05,7.03)  | 0.681                 |     |
| other                                  | 2.62      | (0.48,14.35) | 0.267                 |     |
| <b>YP has freckles</b>                 |           |              | 0.044                 | 944 |
| no                                     | reference |              |                       |     |
| yes, a few                             | 1.15      | (0.87,1.51)  | 0.333                 |     |
| yes, many                              | 0.69      | (0.46,1.04)  | 0.076                 |     |
| <b>tanning ability</b>                 |           |              | 1.65x10 <sup>-4</sup> | 939 |
| always burns never tans                | reference |              |                       |     |
| burns easily rarely tans               | 2.25      | (0.97,5.22)  | 0.060                 |     |
| doesn't change                         | 1.83      | (0.64,5.26)  | 0.260                 |     |
| tans easily rarely burns               | 3.51      | (1.55,7.99)  | 0.003                 |     |
| always tans never burns                | 7.11      | (2.55,19.81) | 1.73x10 <sup>-4</sup> |     |
| can't say, skin always protected       | 2.62      | (0.69,9.98)  | 0.159                 |     |
| <b>sun burning in the past 2 years</b> |           |              | 0.132                 | 906 |
| never                                  | reference |              |                       |     |
| once                                   | 0.71      | (0.49,1.02)  | 0.066                 |     |
| twice                                  | 0.63      | (0.43,0.92)  | 0.017                 |     |
| 3 times                                | 0.72      | (0.44,1.17)  | 0.182                 |     |
| 4 times                                | 1.07      | (0.59,1.93)  | 0.832                 |     |
| 5 times or more                        | 0.99      | (0.53,1.83)  | 0.964                 |     |
| <b>sun protection (0=no/1=yes)</b>     |           |              |                       |     |
| never uses protection                  | 1.28      | (0.77,2.11)  | 0.337                 | 944 |
| wears hat                              | 0.83      | (0.62,1.13)  | 0.244                 | 944 |
| wears clothing                         | 0.68      | (0.50,0.94)  | 0.019                 | 944 |
| wears sunblock                         | 0.79      | (0.47,1.34)  | 0.390                 | 944 |
| avoids the sun                         | 0.55      | (0.33,0.91)  | 0.020                 | 944 |
| <b>sunblock factor</b>                 |           |              | 1.18x10 <sup>-7</sup> | 883 |

|                                                                                        |           |             |                        |     |
|----------------------------------------------------------------------------------------|-----------|-------------|------------------------|-----|
| lower than 15                                                                          | reference |             |                        |     |
| 15-24                                                                                  | 0.75      | (0.47,1.20) | 0.231                  |     |
| 25-49                                                                                  | 0.42      | (0.26,0.67) | 2.72x10 <sup>-4</sup>  |     |
| 50 or higher                                                                           | 0.20      | (0.10,0.41) | 8.39x10 <sup>-6</sup>  |     |
| <b>skin cancer</b> (0=no/1=yes)                                                        |           |             |                        |     |
| YP has family member diagnosed with skin cancer                                        | 1.13      | (0.76,1.67) | 0.548                  | 944 |
| <b>beliefs about tanning</b> (0=no/1=yes)                                              |           |             |                        |     |
| YP believes indoor tanning helps prevent sunburn                                       |           |             | 9.04x10 <sup>-14</sup> | 946 |
| no                                                                                     | reference |             |                        |     |
| yes                                                                                    | 4.10      | (2.87,5.86) | 1.04x10 <sup>-14</sup> |     |
| don't know                                                                             | 1.25      | (0.88,1.76) | 0.213                  |     |
| YP thinks indoor tanning using sun bed/sun lamp can cause skin cancer                  |           |             | 0.003                  | 943 |
| no                                                                                     | reference |             |                        |     |
| yes                                                                                    | 0.36      | (0.16,0.83) | 0.016                  |     |
| don't know                                                                             | 0.70      | (0.27,1.84) | 0.472                  |     |
| <b>body image</b>                                                                      |           |             |                        |     |
| YP is trying to change skin colour (0=no/1=yes)                                        | 0.90      | (0.60,1.35) | 0.615                  | 731 |
| YP is trying to change hair colour (0=no/1=yes)                                        | 0.89      | (0.55,1.43) | 0.627                  | 731 |
| YP has been hurt because of their skin colour (0=no/1=yes)                             | 0.74      | (0.12,4.55) | 0.750                  | 774 |
| YP has been called names because of their skin colour (0=no/1=yes)                     | 1.08      | (0.34,3.38) | 0.899                  | 780 |
| YP has seen someone bullied because of their skin colour (0=no/1=yes)                  | 0.96      | (0.70,1.30) | 0.777                  | 774 |
| YP's teachers treat everybody the same, regardless of skin colour (0=agree/1=disagree) | 0.76      | (0.35,1.62) | 0.473                  | 684 |

<sup>a</sup>Adjusted for age and sex.

**Supplementary Table S11.** Association of socio-demographic, pigmentation-related and sun exposure factors with indoor tanning using spray tan or self-tanning lotions amongst ALSPAC young people (YP) who like to tan.

| <b>exposure</b>                                      | <b>OR<sup>a</sup></b> | <b>95% CI</b> | <b>p-value</b>        | <b>N</b> |
|------------------------------------------------------|-----------------------|---------------|-----------------------|----------|
| <b>sex</b> (0=female/1=male)                         | 0.05                  | (0.03,0.09)   | < 10 <sup>-26</sup>   | 1930     |
| <b>age</b> (years)                                   | 0.99                  | (0.82,1.19)   | 0.908                 | 1930     |
| <b>mother's social class</b> (0=manual/1=non-manual) | 0.87                  | (0.63,1.20)   | 0.401                 | 1598     |
| <b>father's social class</b> (0=manual/1=non-manual) | 0.73                  | (0.58,0.91)   | 0.006                 | 1704     |
| <b>mother's education</b>                            |                       |               | 0.004                 | 1814     |
| < O level                                            | reference             |               |                       |          |
| O level                                              | 0.75                  | (0.56,1.01)   | 0.060                 |          |
| > O level                                            | 0.62                  | (0.46,0.82)   | 0.001                 |          |
| <b>skin colour</b>                                   |                       |               | 6.23x10 <sup>-7</sup> | 1929     |
| very fair                                            | reference             |               |                       |          |
| fair                                                 | 0.60                  | (0.44,0.82)   | 0.001                 |          |
| olive                                                | 0.38                  | (0.26,0.54)   | 7.94x10 <sup>-8</sup> |          |
| brown                                                | 0.35                  | (0.17,0.71)   | 0.004                 |          |
| <b>eye colour</b>                                    |                       |               | 0.348                 | 1926     |
| blue                                                 | reference             |               |                       |          |
| green                                                | 0.88                  | (0.67,1.16)   | 0.363                 |          |
| grey                                                 | 0.92                  | (0.50,1.72)   | 0.804                 |          |
| brown                                                | 0.79                  | (0.62,1.03)   | 0.077                 |          |
| other                                                | 1.18                  | (0.73,1.92)   | 0.495                 |          |
| <b>natural hair colour at 18 years old</b>           |                       |               | 0.045                 | 1927     |
| red                                                  | reference             |               |                       |          |
| blonde                                               | 0.68                  | (0.35,1.33)   | 0.260                 |          |

|                                        |           |             |                       |      |
|----------------------------------------|-----------|-------------|-----------------------|------|
| light brown                            | 0.48      | (0.25,0.92) | 0.027                 |      |
| dark brown                             | 0.51      | (0.26,0.98) | 0.042                 |      |
| black                                  | 0.96      | (0.11,8.48) | 0.974                 |      |
| other                                  | 0.75      | (0.27,2.08) | 0.587                 |      |
| <b>YP has freckles</b>                 |           |             | 0.006                 | 1926 |
| no                                     | reference |             |                       |      |
| yes, a few                             | 1.41      | (1.12,1.77) | 0.003                 |      |
| yes, many                              | 1.47      | (1.06,2.04) | 0.019                 |      |
| <b>tanning ability</b>                 |           |             | 5.10x10 <sup>-9</sup> | 1923 |
| always burns never tans                | reference |             |                       |      |
| burns easily rarely tans               | 0.16      | (0.06,0.46) | 0.001                 |      |
| doesn't change                         | 0.21      | (0.07,0.66) | 0.008                 |      |
| tans easily rarely burns               | 0.09      | (0.03,0.26) | 5.28x10 <sup>-6</sup> |      |
| always tans never burns                | 0.12      | (0.04,0.37) | 2.41x10 <sup>-4</sup> |      |
| <b>sun burning in the past 2 years</b> |           |             | 0.290                 | 1868 |
| never                                  | reference |             |                       |      |
| once                                   | 0.89      | (0.66,1.20) | 0.443                 |      |
| twice                                  | 0.78      | (0.58,1.06) | 0.112                 |      |
| 3 times                                | 0.86      | (0.58,1.26) | 0.432                 |      |
| 4 times                                | 1.17      | (0.74,1.85) | 0.495                 |      |
| 5 times or more                        | 1.23      | (0.73,2.10) | 0.436                 |      |
| <b>sun protection (0=no/1=yes)</b>     |           |             |                       |      |
| never uses protection                  | 0.78      | (0.51,1.22) | 0.277                 | 1928 |
| wears hat                              | 1.12      | (0.87,1.43) | 0.377                 | 1928 |
| wears clothing                         | 0.97      | (0.76,1.24) | 0.791                 | 1928 |
| wears sunblock                         | 1.73      | (1.07,2.81) | 0.027                 | 1928 |
| avoids the sun                         | 1.03      | (0.71,1.50) | 0.872                 | 1928 |
| <b>sunblock factor</b>                 |           |             | 0.074                 | 1798 |



|                                                                                        |           |             |                       |      |
|----------------------------------------------------------------------------------------|-----------|-------------|-----------------------|------|
| lower than 15                                                                          | reference |             |                       |      |
| 15-24                                                                                  | 0.63      | (0.42,0.95) | 0.027                 |      |
| 25-49                                                                                  | 0.58      | (0.39,0.87) | 0.008                 |      |
| 50 or higher                                                                           | 0.62      | (0.37,1.07) | 0.086                 |      |
| <b>skin cancer</b> (0=no/1=yes)                                                        |           |             |                       |      |
| YP has family member diagnosed with skin cancer                                        | 1.11      | (0.82,1.50) | 0.492                 | 1925 |
| <b>beliefs about tanning</b> (0=no/1=yes)                                              |           |             |                       |      |
| YP believes indoor tanning helps prevent sunburn                                       |           |             | 2.57x10 <sup>-4</sup> | 1926 |
| no                                                                                     | reference |             |                       |      |
| yes                                                                                    | 1.84      | (1.35,2.51) | 1.19x10 <sup>-4</sup> |      |
| don't know                                                                             | 0.92      | (0.69,1.22) | 0.544                 |      |
| YP thinks indoor tanning using sun bed/sun lamp can cause skin cancer                  |           |             | 0.021                 | 1924 |
| no                                                                                     | reference |             |                       |      |
| yes                                                                                    | 1.18      | (0.62,2.22) | 0.617                 |      |
| don't know                                                                             | 0.66      | (0.31,1.38) | 0.266                 |      |
| <b>body image</b>                                                                      |           |             |                       |      |
| YP is trying to change skin colour (0=no/1=yes)                                        | 1.71      | (1.20,2.42) | 0.003                 | 1537 |
| YP is trying to change hair colour (0=no/1=yes)                                        | 2.10      | (1.39,3.15) | 3.70x10 <sup>-4</sup> | 1537 |
| YP has been hurt because of their skin colour (0=no/1=yes)                             | 1.54      | (0.33,7.16) | 0.508                 | 1604 |
| YP has been called names because of their skin colour (0=no/1=yes)                     | 1.34      | (0.58,3.08) | 0.495                 | 1608 |
| YP has seen someone bullied because of their skin colour (0=no/1=yes)                  | 1.11      | (0.86,1.44) | 0.414                 | 1599 |
| YP's teachers treat everybody the same, regardless of skin colour (0=agree/1=disagree) | 2.30      | (1.21,4.37) | 0.011                 | 1478 |

<sup>a</sup>Adjusted for age and sex.

**Supplementary Table S17.** Association of indoor tanning using sprays or self-tanning lotions with HirisPlex-S prediction probabilities of pigmentation traits in ALSPAC young people (YP) (N = 1489).

| HirisPlex-S probabilities | OR <sup>a</sup> | 95%                                            | p-value |
|---------------------------|-----------------|------------------------------------------------|---------|
| PBlueEye                  | 1.12            | (0.82,1.52)                                    | 0.477   |
| PIntermediateEye          | 1.14            | (0.22,5.99)                                    | 0.879   |
| PBrownEye                 | 0.87            | (0.62,1.22)                                    | 0.415   |
| PBlondHair                | 0.86            | (0.51,1.45)                                    | 0.580   |
| PBrownHair                | 0.97            | (0.51,1.84)                                    | 0.932   |
| PRedHair                  | 2.15            | (0.95,4.85)                                    | 0.064   |
| PBlackHair                | 0.36            | (0.09,1.49)                                    | 0.161   |
| PLightHair                | 1.41            | (0.86,2.31)                                    | 0.176   |
| PDarkHair                 | 0.71            | (0.43,1.17)                                    | 0.176   |
| PVeryPaleSkin             | 5.16            | (1.31,20.32)                                   | 0.019   |
| PPaleSkin                 | 1.49            | (0.73,3.05)                                    | 0.277   |
| PIntermediateSkin         | 0.57            | (0.31,1.07)                                    | 0.078   |
| PDarkSkin                 | 0.03            | (2.37x10 <sup>-4</sup> ,4.10)                  | 0.164   |
| PDarktoBlackSkin          | 0.06            | (5.66x10 <sup>-9</sup> ,6.16x10 <sup>5</sup> ) | 0.731   |

<sup>a</sup>Adjusted for age, sex and 10 PCs.
